# Supplementary material
Source: MDPI journal article supplement (https://www.mdpi.com/1999-4907/14/1/25)
Supplement: s1 [file s1 › forests-2072794-supplementary.pdf]

**Table S1.** Initial tree attributes and soil characteristics for trial sites for  
2016 and 2017 Paclobutrazol trials

| Trial: Paclobutrazol 2016          |                                        |                                                       |              |                                               |
|------------------------------------|----------------------------------------|-------------------------------------------------------|--------------|-----------------------------------------------|
|                                    | Location                               |                                                       |              |                                               |
|                                    | Allegan, MI                            | Manton, MI                                            | Horton, MI   | Sidney, MI                                    |
| Initial Height (m) (se)            | 1.40 (0.01)                            | 1.63 (0.02)                                           | 1.25 (0.01)  | 1.38 (0.01)                                   |
| Percent of trees with<br>cones (%) | 23.67%                                 | 11%                                                   | 4%           | NA                                            |
| Surface soil texture               | Loamy sand                             | Loamy sand                                            | Sandy loam   | Loamy sand                                    |
| Drainage class                     | Well drained to<br>excessively drained | Well drained to<br>somewhat<br>excessively<br>drained | Well drained | Moderately well<br>drained to well<br>drained |
| Trial: Paclobutrazol 2017          |                                        |                                                       |              |                                               |
|                                    | Location                               |                                                       |              |                                               |
|                                    | Allegan, MI                            | Manton, MI                                            | Horton, MI   | Sidney, MI                                    |
| Initial Height (m) (se)            | 1.27 (0.02)                            | 1.61 (0.01)                                           | 0.92 (0.01)  | 1.60 (0.01)                                   |
| Percent of trees with<br>cones (%) | 0.33%                                  | 9%                                                    | 1%           | 3%                                            |
| Surface soil texture               | Loamy sand                             | Loamy sand                                            | Sandy loam   | Loamy sand                                    |
| Drainage class                     | Well drained to<br>excessively drained | Well drained to<br>somewhat<br>excessively<br>drained | Well drained | Moderately well<br>drained to well<br>drained |

| <b>Table S2.</b> Initial tree attributes and soil characteristics for trial sites 2018 Foliar PGR trials |                     |                                                       |              |                                               |
|----------------------------------------------------------------------------------------------------------|---------------------|-------------------------------------------------------|--------------|-----------------------------------------------|
|                                                                                                          | Location            |                                                       |              |                                               |
|                                                                                                          | Allegan, MI         | Manton, MI                                            | Horton, MI   | Sidney, MI                                    |
| Initial Height (m) (se)                                                                                  | 1.80 (0.01)         | 1.41 (0.02)                                           | 1.77 (0.02)  | 1.89 (0.01)                                   |
| Surface soil texture                                                                                     | Loamy fine sand     | Loamy sand                                            | Sandy loam   | Loamy sand                                    |
| Drainage class                                                                                           | Excessively drained | Well drained to<br>somewhat<br>excessively<br>drained | Well drained | Moderately well<br>drained to well<br>drained |

**Table S3.** Products used for Michigan State University Plant Growth Regulator (PGR) trials

| Product/manufacturer                                    | Active ingredient    | Application    |
|---------------------------------------------------------|----------------------|----------------|
| Cambistat®/ Rainbow Treecare Scientific<br>Advancements | Paclobutrazol        | Soil Injection |
| Trimtect®/ Rainbow Treecare Scientific<br>Advancements  | Paclobutrazol        | Foliar         |
| Citiadel®/ Fine Americas, Inc                           | Chlormequat Chloride | Foliar         |
| Concise®/ Fine Americas, Inc                            | Uniconazole-p        | Foliar         |
| Dazide®/ Fine Americas, Inc                             | Daminozide           | Foliar         |

**Table S4.** Mean bud counts on terminal leader and mean terminal bud density of Fraser fir trees treated with three rates soil applied paclobutrazol, treated with foliar applied paclobutrazol, or left untreated (Control). Top: trees treated with soil application in 2016 or foliar-treated annually 2016-2018. Bottom: trees treated with soil application in 2017 or foliar-treated annually 2017-2019.

| Treatments initiated in 2016 |                                        |         |      |                                         |      |      |
|------------------------------|----------------------------------------|---------|------|-----------------------------------------|------|------|
| Treatment                    | Leader bud counts<br>(buds per leader) |         |      | Bud density<br>(buds cm <sup>-1</sup> ) |      |      |
|                              | 2017                                   | 2018    | 2019 | 2017                                    | 2018 | 2019 |
| Control                      | 16.1a                                  | 17.7a   | 16.7 | 0.41bc                                  | 0.39 | 0.35 |
| 100 ml                       | 15.2ab                                 | 16.5abc | 16.6 | 0.43ab                                  | 0.38 | 0.36 |
| 200 ml                       | 14.1bc                                 | 15.4bc  | 15.3 | 0.42b                                   | 0.38 | 0.34 |
| 300 ml                       | 13.9c                                  | 15.2c   | 15.5 | 0.46a                                   | 0.38 | 0.37 |
| Foliar                       | 13.0c                                  | 16.9ab  | 15.7 | 0.39c                                   | 0.38 | 0.36 |

  

| Treatments initiated in 2017 |                                        |        |        |                                         |      |      |
|------------------------------|----------------------------------------|--------|--------|-----------------------------------------|------|------|
| Treatment                    | Leader bud counts<br>(buds per leader) |        |        | Bud density<br>(buds cm <sup>-1</sup> ) |      |      |
|                              | 2018                                   | 2019   | 2020   | 2018                                    | 2019 | 2020 |
| Control                      | 15.6a                                  | 18.6a  | 17.9a  | 0.37ab                                  | 0.38 | 0.41 |
| 100 ml                       | 14.1ab                                 | 16.8b  | 17.1ab | 0.38ab                                  | 0.37 | 0.40 |
| 200 ml                       | 14.4ab                                 | 16.1ab | 16.4ab | 0.39a                                   | 0.37 | 0.40 |
| 300 ml                       | 13.8b                                  | 15.2b  | 16.4ab | 0.38ab                                  | 0.38 | 0.41 |
| Foliar                       | 14.4ab                                 | 15.8ab | 15.6b  | 0.35b                                   | 0.37 | 0.40 |

Note: Means within a column indicated by the same letter are not different at  $p < 0.05$ . Mean separation by Tukey's HSD test.

**Table S5.** Mean bud counts on terminal leader and mean bud density of Fraser fir trees treated with four plant growth regulators or left untreated (Control). Each PGR was applied once (1×) or applied a second time approximately 1 week later (2×). Foliar treatments were applied annually in 2018 and 2019.

| Treatment                 | Leader bud count<br>(buds per leader) |        | Bud density<br>(buds cm <sup>-1</sup> ) |      |
|---------------------------|---------------------------------------|--------|-----------------------------------------|------|
|                           | 2019                                  | 2020   | 2019                                    | 2020 |
| Control                   | 15.7abc                               | 16.1a  | 0.37ab                                  | 0.38 |
| Chlormequat chloride (1×) | 15.7ab                                | 15.4a  | 0.36ab                                  | 0.36 |
| Chlormequat chloride (2×) | 15.5abc                               | 15.4a  | 0.36ab                                  | 0.38 |
| Uniconazole-p (1×)        | 16.4a                                 | 16.3a  | 0.37ab                                  | 0.36 |
| Uniconazole-p (2×)        | 14.8abc                               | 14.5ab | 0.35ab                                  | 0.35 |
| Daminozide (1×)           | 15.3abc                               | 14.8ab | 0.33b                                   | 0.36 |
| Daminozide (2×)           | 15.4abc                               | 14.7ab | 0.35ab                                  | 0.37 |
| Paclobutrazol (1×)        | 13.7bc                                | 14.8ab | 0.37ab                                  | 0.40 |
| Paclobutrazol (2×)        | 13.3c                                 | 11.8c  | 0.38a                                   | 0.38 |

Note: Means within a column indicated by the same letter are not different at  $p < 0.05$ . Mean separation by Tukey's HSD test.
